# Supplementary material for: Mechanisms of recalcitrant fucoidan breakdown in marine Planctomycetota
Source: PubMed Central journal article supplement — Nat Commun. 2024 Dec 30;15:10906. doi: 10.1038/s41467-024-55268-w (PMC11685898; doi:10.1038/s41467-024-55268-w), 2024-12-30
Supplement: 41467_2024_55268_MOESM2_ESM.pdf [file 41467_2024_55268_MOESM2_ESM.pdf]

## **Description of Additional Supplementary Files:**

**Supplementary Dataset 1:** Genome annotation, transcriptome and proteome analysis results of strain 892

**Supplementary Dataset 2:** Genome annotation, transcriptome and proteome analysis results of strain 913

**Supplementary Dataset 3:** Sequence percent identity between exo-fucosidases in strain 892

**Supplementary Dataset 4:** Sequence percent identity between exo-fucosidases in strain 913

**Supplementary Dataset 5:** Wilcoxon rank sum test results comparing transcripts per cell in each PUL and carbon source.

**Supplementary Dataset 6:** Detected fucosidases in Planctomycetota, Verrucomicrobia and Bacteroidota genomes.

**Supplementary Dataset 7:** Reciprocal best match blast of GH168 encoded in genomes from Planctomycetota, Verrucomicrobia and Bacteroidota.

**Supplementary Dataset 8:** Alphafold-predicted structure of the enzyme Fun168D

**Supplementary Dataset 9:** Alphafold-predicted structure of the enzyme 913\_05635 from strain 913

**Supplementary Dataset 10:** Alphafold-predicted structure of the enzyme 892\_06289 from strain 892

**Supplementary Dataset 11:** Alphafold-predicted structure of the enzyme 913\_01189 from strain 913

**Supplementary Dataset 12:** Alphafold-predicted structure of the enzyme 892\_06282 from strain 892
